# Supplementary material for: Transcriptome-wide identification and characterization of microRNAs in diverse phases of wood formation in Populus trichocarpa
Source: Research Square preprint supplement (doi:10.21203/rs.3.rs-108245/v1), 2020-11-16
Supplement: Supplementary file 1 [file 5bfcb72c5fe4e7eb366cb977.xlsx]

## Sheet: S4 PS-TS-miR
Table S4 DE-miRNA library for PS vs TS
id	family	PS-1_TPM	PS-2_TPM	PS-3_TPM	TS-1_TPM	TS-2_TPM	TS-3_TPM	control_mean	treat_mean	log2(fc)	PValue
miR1444-y	miR1444	0.5198	0.1087	1.4739	1.5469	4.7658	1.1914	0.7008	2.50137	1.83564	0.0413919
miR164-x	miR164	5.9775	1.6299	17.0318	25.1376	57.4625	56.5073	8.21307	46.3691	2.49717	0.00144054
miR164-z	miR164	0.2599	0	0.8188	0.7735	3.1318	1.1914	0.359567	1.6989	2.24027	0.0189749
miR165-x	miR165	9.3561	5.4331	10.1536	4.6408	1.3617	3.0636	8.31427	3.02203	-1.46007	0.031926
miR166-x	miR166	136.703	59.3299	162.949	52.0799	42.348	53.1032	119.661	49.177	-1.28289	0.0326677
miR170-x	miR170	2.339	0.652	5.7319	0.2578	0.2723	1.5318	2.90763	0.6873	-2.08083	0.0208929
miR2111-x	miR2111	0.7797	0	0.8188	1.0313	8.4424	5.1061	0.532833	4.85993	3.18918	0.00423412
miR3627-x	miR3627	0.9096	0.1087	1.3101	0.2578	0	0	0.776133	0.0859333	-3.17501	0.0459729
miR390-x	miR390	1.4294	0.326	5.7319	2.7071	9.804	10.7228	2.49577	7.74463	1.63371	0.0402196
miR393-y	miR393	0	0	0	0.2578	0.4085	0.3404	0.01	0.335567	5.06853	0.0458249
miR394-y	miR394	0	0	0	0.2578	0.9532	0.3404	0.01	0.517133	5.69246	0.0203644
miR396-x	miR396	161.003	69.8702	918.244	583.965	1766.9	1670.03	383.039	1340.3	1.80699	0.0168831
miR6265-x	miR6265	0.7797	0.1087	1.4739	1.5469	4.085	2.8934	0.787433	2.84177	1.85156	0.0419453
miR7741-y	miR7741	0	0	0	0	2.1787	0.3404	0.01	0.8397	6.3918	0.0212255
miR858-x	miR858	69.1313	37.38	590.873	31.8409	55.6923	68.7618	232.461	52.0983	-2.15768	0.021257
miR858-y	miR858	5.4577	2.1733	15.8854	1.6758	1.7702	2.7232	7.8388	2.0564	-1.93051	0.0129736
miR9776-x	miR9776	0	0	0	0.3867	0.4085	0.5106	0.01	0.435267	5.44383	0.023559
novel-m0003-3p	-	0.3898	0.5433	0.1638	0	0	0	0.365633	0.01	-5.19233	0.0188388
novel-m0031-5p	-	0.6497	2.1733	1.6377	0.5156	0.1362	0	1.4869	0.217267	-2.77477	0.00912865
novel-m0037-3p	-	0	0	0	0.2578	0.2723	0.5106	0.01	0.3469	5.11645	0.048531
novel-m0048-3p	-	0.1299	1.5213	0.8188	0.1289	0.1362	0	0.823333	0.0883667	-3.2199	0.0117255
novel-m0086-5p	-	2.339	3.2599	0.9826	0.7735	0.5447	0.3404	2.19383	0.552867	-1.98845	0.00955283
novel-m0095-5p	-	0.3898	1.0866	0.4913	0	0.1362	0.5106	0.6559	0.2156	-1.60512	0.0422924
novel-m0148-5p	-	0.3898	1.0866	0.4913	0	0.1362	0.5106	0.6559	0.2156	-1.60512	0.04211
novel-m0150-3p	-	0.3898	0.5433	0.1638	0	0	0	0.365633	0.01	-5.19233	0.0188817
novel-m0177-5p	-	1.1695	1.5213	0.9826	0.6446	0.4085	0.3404	1.22447	0.4645	-1.3984	0.0442245
novel-m0217-5p	-	0.9096	2.6079	0.3275	0.6446	0.1362	0.6808	1.28167	0.4872	-1.39544	0.0376451
novel-m0280-3p	-	0.3898	0.7606	0.4913	0.1289	0	0	0.547233	0.0429667	-3.67087	0.0175365
novel-m0292-3p	-	0.9096	0	2.2927	2.5782	12.5274	7.4889	1.06743	7.5315	2.81879	0.0034092
novel-m0302-3p	-	0	0.978	0.3275	0	0	0	0.435167	0.01	-5.4435	0.0197775
novel-m0316-5p	-	5.1978	3.8032	5.4043	2.9649	0.9532	1.702	4.80177	1.87337	-1.35793	0.0432654
novel-m0322-5p	-	0.2599	0.4347	0.4913	0	0	0	0.3953	0.01	-5.30488	0.0182329
novel-m0339-5p	-	1.1695	1.5213	0.9826	0.6446	0.4085	0.3404	1.22447	0.4645	-1.3984	0.0441668
novel-m0346-3p	-	0.5198	0.2173	0.4913	0	0	0	0.409467	0.01	-5.35567	0.0151145
novel-m0361-3p	-	0.2599	0.2173	0.4913	0	0	0	0.322833	0.01	-5.01272	0.035501
novel-m0362-3p	-	0.2599	0.2173	0.4913	0	0	0	0.322833	0.01	-5.01272	0.0355266
novel-m0368-5p	-	1.1695	0.5433	0.1638	0.1289	0	0	0.625533	0.0429667	-3.8638	0.0167949
novel-m0389-5p	-	0	0	0	0.2578	0.4085	0.3404	0.01	0.335567	5.06853	0.0457787
novel-m0408-3p	-	0.1299	0	0	0.5156	0.9532	0.5106	0.0433	0.6598	3.92959	0.0232283
novel-m0409-5p	-	0.3898	0.5433	3.2753	0.2578	0.1362	0.1702	1.4028	0.188067	-2.89899	0.0155141
novel-m0435-3p	-	0.5198	0.652	0	0	0	0	0.3906	0.01	-5.28762	0.018146
novel-m0465-3p	-	0	0.652	0.4913	0	0	0	0.3811	0.01	-5.2521	0.0343618
novel-m0503-5p	-	1.0396	0.4347	0.6551	0	0	0	0.7098	0.01	-6.14934	0.00202029
novel-m0530-5p	-	1.1695	0.326	1.4739	0.1289	0.4085	0	0.9898	0.179133	-2.4661	0.0175553
novel-m0539-3p	-	0.7797	0.326	0.4913	0	0.1362	0	0.532333	0.0454	-3.55157	0.022859
novel-m0582-5p	-	1.8192	0.5433	0.6551	0.3867	0.4085	0.1702	1.00587	0.3218	-1.6442	0.0481825
novel-m0585-3p	-	0.9096	0.326	0	0	0	0	0.411867	0.01	-5.36411	0.0227854
novel-m0586-3p	-	0.9096	0.326	0	0	0	0	0.411867	0.01	-5.36411	0.0227715
novel-m0596-5p	-	0.6497	0.326	0.3275	0	0	0	0.4344	0.01	-5.44095	0.0125172
novel-m0600-3p	-	0.7797	0.8693	0.8188	0.2578	0.2723	0.1702	0.8226	0.233433	-1.81718	0.0254651
novel-m0609-3p	-	0.3898	0.652	0	0	0	0	0.347267	0.01	-5.11797	0.0239588
novel-m0647-5p	-	0.3898	1.0866	0.4913	0	0.1362	0.5106	0.6559	0.2156	-1.60512	0.0421786
novel-m0659-3p	-	0.3898	1.9559	0.6551	0.5156	0	0.3404	1.00027	0.285333	-1.80966	0.0403511
novel-m0721-3p	-	0.1299	0.652	0.8188	0	0	0.1702	0.533567	0.0567333	-3.2334	0.0318672
novel-m0747-5p	-	0	0	0.4913	0.6446	2.0425	2.2126	0.163767	1.63323	3.31802	0.00222856
novel-m0755-5p	-	0.3898	0	1.3101	0	0	0	0.566633	0.01	-5.82434	0.0413505
novel-m0772-5p	-	0.3898	0.2173	0.3275	0	0	0	0.311533	0.01	-4.96131	0.0285512
novel-m0813-5p	-	2.2091	1.5213	0.4913	0.7735	0.2723	0.5106	1.40723	0.5188	-1.43961	0.0441207
novel-m0842-3p	-	0.7797	1.1953	0.6551	0.3867	0	0.1702	0.8767	0.185633	-2.23963	0.0251588
novel-m0854-5p	-	0.6497	1.0866	0.1638	0	0.2723	0	0.633367	0.0907667	-2.80281	0.0278142
novel-m0856-3p	-	1.1695	0.326	0.1638	0.1289	0	0	0.5531	0.0429667	-3.68625	0.0281007
novel-m0861-5p	-	0.5198	1.4126	0.6551	0.3867	0.4085	0.1702	0.8625	0.3218	-1.42236	0.0490069
novel-m0867-5p	-	0.6497	0.2173	0.1638	0	0	0	0.3436	0.01	-5.10266	0.0367596
novel-m0879-5p	-	1.9492	0.4347	2.9478	0.1289	0.817	0.5106	1.77723	0.4855	-1.87209	0.0263383
novel-m0910-3p	-	0.6497	1.1953	1.4739	0.2578	0.2723	0.6808	1.1063	0.403633	-1.45463	0.0448781
novel-m0976-3p	-	0.9096	0	2.2927	2.5782	12.5274	7.4889	1.06743	7.5315	2.81879	0.0034143
novel-m0985-3p	-	1.1695	0.326	0.1638	0.1289	0	0	0.5531	0.0429667	-3.68625	0.0280532
novel-m1023-5p	-	0.3898	1.0866	0.4913	0	0.1362	0.5106	0.6559	0.2156	-1.60512	0.041556
novel-m1033-5p	-	0.3898	0.4347	0.6551	0	0	0	0.4932	0.01	-5.6241	0.00766687
novel-m1076-5p	-	0	0	0	0.5156	0.1362	0.3404	0.01	0.330733	5.0476	0.0485265
novel-m1077-5p	-	0	0	0	0.5156	0.1362	0.3404	0.01	0.330733	5.0476	0.0485486
novel-m1083-3p	-	0.1299	0.652	0.3275	0	0	0	0.3698	0.01	-5.20867	0.0225606
novel-m1095-3p	-	0.6497	0.1087	0.9826	0.1289	0	0	0.580333	0.0429667	-3.75559	0.0425692
novel-m1169-5p	-	0.2599	0.652	0.1638	0	0	0	0.358567	0.01	-5.16417	0.0227526
novel-m1200-5p	-	1.9492	0.4347	2.9478	0.1289	0.817	0.5106	1.77723	0.4855	-1.87209	0.0262662
novel-m1201-5p	-	0.2599	0.5433	0.1638	0	0	0	0.322333	0.01	-5.01048	0.0319743
novel-m1203-5p	-	0	0	0	0	1.4978	1.5318	0.01	1.00987	6.65802	0.00930319
novel-m1205-5p	-	0	0	0	0.7735	0.2723	0.3404	0.01	0.462067	5.53003	0.0303016
novel-m1212-5p	-	0.3898	1.0866	0.4913	0	0.1362	0.5106	0.6559	0.2156	-1.60512	0.0423759
novel-m1215-5p	-	0.3898	1.0866	0.4913	0	0.1362	0.5106	0.6559	0.2156	-1.60512	0.0419456
novel-m1238-5p	-	0	0	0	0	1.4978	1.5318	0.01	1.00987	6.65802	0.00934696
novel-m1257-5p	-	0.1299	0.978	0	0	0	0	0.3693	0.01	-5.20672	0.0202271
novel-m1310-5p	-	0.7797	0.7606	1.1464	0.1289	0.4085	0.1702	0.895567	0.235867	-1.92483	0.025252
novel-m1314-5p	-	0.6497	2.1733	1.6377	0.5156	0.1362	0	1.4869	0.217267	-2.77477	0.00910295
novel-m1345-3p	-	0.7797	0.7606	1.1464	0.1289	0.4085	0.1702	0.895567	0.235867	-1.92483	0.0253588
novel-m1356-3p	-	0	0	0.1638	0.6446	1.3617	1.0212	0.0546	1.00917	4.20812	0.00378359
novel-m1368-3p	-	0.3898	0.326	1.9652	0	0.1362	0.5106	0.893667	0.2156	-2.05138	0.0496674
novel-m1375-5p	-	1.0396	3.0426	1.6377	0.6446	0.4085	0.3404	1.90663	0.4645	-2.03728	0.00857155
novel-m1378-3p	-	1.1695	0.978	0.8188	0.2578	0.2723	0.5106	0.988767	0.3469	-1.51111	0.0358978
novel-m1432-5p	-	0.7797	0.5433	0.4913	0	0.2723	0	0.604767	0.0907667	-2.73614	0.0371076
novel-m1435-3p	-	1.0396	0.978	0.6551	0.3867	0.2723	0	0.8909	0.219667	-2.01995	0.0217359
novel-m1477-5p	-	0.6497	2.3906	2.6203	0.2578	0.9532	1.0212	1.88687	0.744067	-1.34249	0.0366546
novel-m1483-3p	-	1.1695	0.326	0.1638	0.1289	0	0	0.5531	0.0429667	-3.68625	0.0280393
novel-m1496-5p	-	0	0	0	0.2578	1.634	0.5106	0.01	0.8008	6.32337	0.00587498
novel-m1535-3p	-	0	0	0	0.2578	0.2723	0.5106	0.01	0.3469	5.11645	0.0483278
novel-m1568-5p	-	0.3898	1.0866	0.4913	0	0.1362	0.5106	0.6559	0.2156	-1.60512	0.0417386
novel-m1572-5p	-	11.955	13.8002	25.7115	7.9925	6.9445	7.8293	17.1556	7.58877	-1.17674	0.0388471
novel-m1601-5p	-	1.6893	1.7386	1.6377	0.2578	0.2723	0.6808	1.68853	0.403633	-2.06465	0.00612496
novel-m1629-3p	-	0	0	0	0.2578	0.2723	0.5106	0.01	0.3469	5.11645	0.0487354
novel-m1674-5p	-	0.2599	0.1087	0.6551	0.9024	1.7702	1.702	0.341233	1.4582	2.09536	0.0416936
novel-m1697-5p	-	0.6497	0.652	1.1464	0.2578	0.1362	0.1702	0.816033	0.188067	-2.11738	0.0355515
ptc-miR164f	miR164	0.1299	0	0.1638	0.6446	1.3617	2.0424	0.0979	1.34957	3.78504	0.0035365
ptc-miR2111a	miR2111	0.9096	0.1087	3.9304	3.2228	20.4251	16.8501	1.64957	13.4993	3.03273	0.000960173
ptc-miR2111b	miR2111	0.9096	0.1087	3.9304	3.2228	20.4251	16.8501	1.64957	13.4993	3.03273	0.000959748
ptc-miR3627a	miR3627	12.8647	2.9339	23.4188	1.6758	2.451	1.8722	13.0725	1.99967	-2.7087	0.000716697
ptc-miR390a	miR390	166.461	43.7911	595.95	417.799	867.657	1166.74	268.734	817.398	1.60486	0.0305028
ptc-miR390b	miR390	166.461	43.7911	596.114	417.799	867.112	1165.89	268.789	816.933	1.60375	0.0303497
ptc-miR390c	miR390	166.461	43.7911	595.95	417.799	867.657	1166.74	268.734	817.398	1.60486	0.0304537
ptc-miR390d-5p	miR390	166.461	43.7911	596.114	417.799	867.112	1165.89	268.789	816.933	1.60375	0.0304646
ptc-miR396a	miR396	23286.2	18238.1	253283	195066	579486	528166	98269	434239	2.14368	0.00692628
ptc-miR396b	miR396	23286.2	18238.1	253283	195066	579486	528166	98269	434239	2.14368	0.0069908
ptc-miR396f	miR396	2192.32	1980.7	2246.07	785.452	506.541	560.477	2139.7	617.49	-1.79292	0.00482817
ptc-miR6457b	miR6457	7.9267	2.2819	22.5999	2.836	3.5403	4.0849	10.9362	3.48707	-1.64902	0.0371454
ptc-miR6462c-5p	miR6462	1.1695	0.5433	4.5855	0.2578	0.2723	0.1702	2.09943	0.233433	-3.16892	0.00211566

## Sheet: S5 PS-SS-miR
Table S5 DE-miRNA library for PS vs SS
id	family	PS-1_TPM	PS-2_TPM	PS-3_TPM	SS-1_TPM	SS-2_TPM	SS-3_TPM	control_mean	treat_mean	log2(fc)	PValue
miR11544-x	miR11544	0.2599	0	0.3275	0.3102	2.8243	1.0305	0.1958	1.38833	2.8259	0.0106261
miR1167-y	miR1167	0.1299	0.2173	0.8188	0	0	0	0.388667	0.01	-5.28046	0.0473307
miR1444-y	miR1444	0.5198	0.1087	1.4739	4.1874	3.3155	0.3435	0.7008	2.61547	1.89999	0.0151038
miR159-x	miR159	168.54	117.682	399.101	38.3066	36.3475	40.1876	228.441	38.2806	-2.57714	0.000691652
miR164-x	miR164	5.9775	1.6299	17.0318	53.9704	52.0653	53.5834	8.21307	53.2064	2.69561	2.37659e-05
miR164-z	miR164	0.2599	0	0.8188	1.3958	1.9647	2.4044	0.359567	1.92163	2.418	0.00188244
miR165-x	miR165	9.3561	5.4331	10.1536	0.1551	0.1228	0.5152	8.31427	0.264367	-4.97498	2.53796e-07
miR165-y	miR165	179.326	142.022	46.0187	0.6203	1.3508	4.1218	122.456	2.03097	-5.91395	3.08517e-08
miR166-x	miR166	136.703	59.3299	162.949	1.861	2.5787	5.6675	119.661	3.36907	-5.15046	8.47642e-10
miR166-y	miR166	4507.18	6873.46	3602.23	98.3255	126.479	424.889	4994.29	216.565	-4.52741	5.88176e-07
miR166-z	miR166	1.2995	0.8693	0.3275	0	0	0	0.8321	0.01	-6.37869	0.00147353
miR170-x	miR170	2.339	0.652	5.7319	0	0.1228	0.5152	2.90763	0.212667	-3.77318	0.00090672
miR171-y	miR171	18.7656	8.5957	16.3155	2.5989	1.9559	10.9724	14.5589	5.17573	-1.49207	0.0139429
miR2111-x	miR2111	0.7797	0	0.8188	3.4119	4.2978	3.2631	0.532833	3.6576	2.77914	0.000752555
miR2662-y	miR2662	0	0	0.4913	0.9305	0.7368	1.3739	0.163767	1.01373	2.62996	0.00705749
miR384-x	miR384	21.5572	22.226	11.6784	1.0396	0.2173	10.4811	18.4872	3.91267	-2.2403	0.000714455
miR390-x	miR390	1.4294	0.326	5.7319	4.4975	2.8243	9.7893	2.49577	5.7037	1.19242	0.0344394
miR393-x	miR393	22.0908	8.5844	101.044	92.5872	140.724	104.763	43.9066	112.691	1.35987	0.00839496
miR394-x	miR394	1.8192	0.326	29.4781	55.8315	59.5558	26.7917	10.5411	47.393	2.16865	0.00190939
miR396-x	miR396	161.003	69.8702	918.244	2293.9	2528.73	2089.07	383.039	2303.9	2.58851	4.78043e-05
miR397-x	miR397	1.861	3.4383	0.1717	0	0	0.6551	1.82367	0.218367	-3.06202	0.00308743
ptc-miR397a	miR397	2.7916	3.1927	0	0	0	1.1464	1.99477	0.382133	-2.38407	0.0176989
miR408-x	miR408	4.5481	5.6505	1.3101	1.3958	1.5963	0.3435	3.83623	1.11187	-1.78671	0.0342089
miR4394-y	miR4394	1.8192	4.8898	1.9652	1.0856	0.614	1.8892	2.8914	1.19627	-1.27323	0.0459685
miR5054-y	miR5054	3.6385	0.7606	5.8956	7.7544	5.6486	11.6784	3.43157	8.36047	1.28472	0.0334505
miR5168-y	miR5168	249.497	298.171	141.495	3.7221	4.5434	15.4568	229.721	7.90743	-4.86053	1.77221e-07
miR6265-x	miR6265	0.7797	0.1087	1.4739	3.4119	1.1052	4.637	0.787433	3.05137	1.95423	0.0100135
miR6425-x	miR6425	1.2995	0.2173	25.384	0.3102	0.9824	0.5152	8.96693	0.6026	-3.89534	0.0139237
miR6425-y	miR6425	16.5032	14.6695	13.1014	0.9305	1.5963	2.7479	14.758	1.75823	-3.0693	9.45243e-05
miR6427-y	miR6427	2.0791	2.3906	4.7493	0.6203	0.614	0.8587	3.073	0.697667	-2.13904	0.0123669
miR6437-y	miR6437	5.4577	2.4992	0.9826	0.6203	0.614	1.7174	2.97983	0.9839	-1.59865	0.0335307
miR6448-y	miR6448	0.1299	0	1.1464	2.0161	0.9824	1.5457	0.425433	1.51473	1.83206	0.0153363
miR6478-x	miR6478	14.6839	1.7386	83.6852	69.0139	83.3782	91.3666	33.3692	81.2529	1.2839	0.0140991
miR8175-y	miR8175	21.9609	3.1512	98.0967	147.178	111.007	194.755	41.0696	150.98	1.87822	0.00173743
miR858-x	miR858	69.1313	37.38	590.873	21.7122	12.5251	12.0219	232.461	15.4197	-3.91414	0.000240016
miR858-y	miR858	5.4577	2.1733	15.8854	1.3958	0.2456	0.3435	7.8388	0.661633	-3.56653	0.000783612
miR858-z	miR858	0.3898	0.2173	5.8956	0.3102	0.1228	0	2.16757	0.144333	-3.9086	0.0358846
miR894-x	miR894	809.564	327.618	1233.99	1996.75	1378.5	3222.56	790.39	2199.27	1.47639	0.0283959
miR9726-y	miR9726	1.0396	0.5433	28.0042	1.2407	1.1052	0.687	9.86237	1.01097	-3.2862	0.0366628
miR9776-x	miR9776	0	0	0	0.6203	0.7368	0.8587	0.01	0.7386	6.20672	0.00241306
novel-m0632-5p	-	0.1299	0.326	0.6551	0	0	0	0.370333	0.01	-5.21075	0.0287473
novel-m0003-3p	-	0.3898	0.5433	0.1638	0	0	0	0.365633	0.01	-5.19233	0.0312545
novel-m0004-3p	-	1.2995	1.1953	0.6551	0	0.1228	0.687	1.04997	0.269933	-1.95967	0.0389158
novel-m0031-5p	-	0.6497	2.1733	1.6377	0	0.2456	0	1.4869	0.0818667	-4.18289	0.00222867
novel-m0047-5p	-	0.1299	0.2173	0.8188	0	0	0	0.388667	0.01	-5.28046	0.0474432
novel-m0048-3p	-	0.1299	1.5213	0.8188	0.1551	0.2456	0	0.823333	0.133567	-2.62392	0.0360691
novel-m0050-5p	-	1.6893	0.978	2.9478	0.1551	0	0	1.8717	0.0517	-5.17804	0.000166828
novel-m0058-3p	-	0	0	0	0.7754	0.2456	0.5152	0.01	0.512067	5.67826	0.0134039
novel-m0060-3p	-	2.0791	0.8693	1.9652	0	0.1228	0.5152	1.63787	0.212667	-2.94515	0.00549702
novel-m0061-3p	-	2.0791	0.8693	1.9652	0	0.1228	0.5152	1.63787	0.212667	-2.94515	0.00551677
novel-m0066-3p	-	0.5198	0.7606	0.6551	0.1551	0	0	0.645167	0.0517	-3.64144	0.0169124
novel-m0075-5p	-	0.5198	1.1953	0.3275	0	0.1228	0.1717	0.680867	0.0981667	-2.79407	0.0234565
novel-m0076-3p	-	0.5198	1.7386	1.9652	0.1551	0.2456	0.687	1.40787	0.362567	-1.95719	0.0338641
novel-m0086-5p	-	2.339	3.2599	0.9826	0	0.1228	0.5152	2.19383	0.212667	-3.36679	0.00129254
novel-m0088-5p	-	5.0679	6.6284	4.4217	0.3102	0.2456	1.7174	5.37267	0.757733	-2.82588	0.000796365
novel-m0094-5p	-	1.0396	0.978	3.1116	0.1551	0.3684	0.3435	1.70973	0.289	-2.56463	0.0150744
novel-m0095-5p	-	0.3898	1.0866	0.4913	0	0	0	0.6559	0.01	-6.0354	0.00377911
novel-m0106-3p	-	0	0	0	0.3102	0.1228	0.8587	0.01	0.430567	5.42816	0.0369961
novel-m0108-5p	-	1.0396	0.978	3.1116	0.1551	0.3684	0.3435	1.70973	0.289	-2.56463	0.0151511
novel-m0112-5p	-	0.6497	1.1953	0.4913	0.3102	0.1228	0.1717	0.778767	0.201567	-1.94993	0.0466366
novel-m0113-3p	-	2.7289	2.4992	2.6203	0.6203	0.3684	1.8892	2.61613	0.9593	-1.44738	0.0388551
novel-m0128-5p	-	0.3898	0	8.5159	0.1551	0	0.1717	2.96857	0.108933	-4.76825	0.0164846
novel-m0145-5p	-	0.9096	0.2173	2.6203	0	0	0	1.24907	0.01	-6.96471	0.0008469
novel-m0148-5p	-	0.3898	1.0866	0.4913	0	0	0	0.6559	0.01	-6.0354	0.00377779
novel-m0150-3p	-	0.3898	0.5433	0.1638	0	0	0	0.365633	0.01	-5.19233	0.0311184
novel-m0171-3p	-	45.3512	51.2888	24.8927	7.2891	10.6832	30.0548	40.5109	16.009	-1.33942	0.0236407
novel-m0174-3p	-	0.9096	0.2173	0	0	0	0	0.375633	0.01	-5.23125	0.0417586
novel-m0231-3p	-	0.2599	0.326	0.3275	0	0	0	0.304467	0.01	-4.92821	0.0437243
novel-m0238-5p	-	2.7289	3.2599	0.8188	0.3102	0.614	0	2.2692	0.308067	-2.88087	0.0086214
novel-m0243-3p	-	2.9888	7.2804	4.258	0.3102	0.614	1.3739	4.8424	0.766033	-2.66024	0.00137152
novel-m0260-5p	-	0.1299	0.978	0.6551	0	0	0	0.587667	0.01	-5.87693	0.00895637
novel-m0280-3p	-	0.3898	0.7606	0.4913	0	0	0	0.547233	0.01	-5.77408	0.00787108
novel-m0289-3p	-	2.9888	0.8693	4.0942	0.6203	0.4912	1.2022	2.65077	0.771233	-1.78117	0.0423928
novel-m0292-3p	-	0.9096	0	2.2927	3.1017	6.8765	9.4458	1.06743	6.47467	2.60066	0.000670642
novel-m0316-5p	-	5.1978	3.8032	5.4043	0.1551	0.1228	0.3435	4.80177	0.207133	-4.53493	5.043e-06
novel-m0322-5p	-	0.2599	0.4347	0.4913	0	0	0	0.3953	0.01	-5.30488	0.0235746
novel-m0346-3p	-	0.5198	0.2173	0.4913	0	0	0	0.409467	0.01	-5.35567	0.0222417
novel-m0352-3p	-	0	0	0.1638	0.3102	0.2456	0.687	0.0546	0.414267	2.92359	0.0268734
novel-m0353-5p	-	0.2599	0.2173	0.8188	0	0	0	0.432	0.01	-5.43296	0.0263749
novel-m0368-5p	-	1.1695	0.5433	0.1638	0	0	0	0.625533	0.01	-5.96701	0.00740817
novel-m0370-5p	-	0	0	0.6551	0.9305	0.614	0.5152	0.218367	0.686567	1.65265	0.0439375
novel-m0374-5p	-	0.9096	1.8473	0	0	0.1228	0.1717	0.918967	0.0981667	-3.22671	0.0109425
novel-m0409-5p	-	0.3898	0.5433	3.2753	0.3102	0	0	1.4028	0.1034	-3.762	0.0247622
novel-m0435-3p	-	0.5198	0.652	0	0	0	0	0.3906	0.01	-5.28762	0.0229447
novel-m0450-3p	-	0.6497	0.652	0.4913	0	0	0	0.597667	0.01	-5.90127	0.00559897
novel-m0464-5p	-	0.9096	1.4126	0.1638	0.1551	0	0	0.828667	0.0517	-4.00256	0.00682171
novel-m0471-5p	-	0.6497	0.1087	1.9652	0	0	0.1717	0.907867	0.0572333	-3.98755	0.0275242
novel-m0499-5p	-	1.5594	1.304	0.6551	0	0	0.687	1.17283	0.229	-2.35658	0.0223168
novel-m0503-5p	-	1.0396	0.4347	0.6551	0	0	0	0.7098	0.01	-6.14934	0.00340907
novel-m0513-3p	-	0.3898	0.4347	0.1638	0	0	0	0.329433	0.01	-5.04191	0.0342084
novel-m0521-3p	-	2.2091	1.1953	0.3275	0	0	0.5152	1.24397	0.171733	-2.85671	0.0128781
novel-m0522-3p	-	0.3898	0.652	0.3275	0	0	0	0.456433	0.01	-5.51233	0.016853
novel-m0530-5p	-	1.1695	0.326	1.4739	0.1551	0.1228	0	0.9898	0.0926333	-3.41753	0.0105049
novel-m0539-3p	-	0.7797	0.326	0.4913	0	0	0	0.532333	0.01	-5.73426	0.0112457
novel-m0540-3p	-	0.7797	3.8032	2.129	0.1551	0.1228	0.1717	2.2373	0.149867	-3.90001	0.000553415
novel-m0556-3p	-	2.9888	7.2804	4.258	0.3102	0.614	1.3739	4.8424	0.766033	-2.66024	0.00137208
novel-m0579-3p	-	1.0396	1.0866	1.3101	0	0.1228	0	1.14543	0.0409333	-4.80647	0.00135232
novel-m0582-5p	-	1.8192	0.5433	0.6551	0	0.1228	0.5152	1.00587	0.212667	-2.24177	0.0373926
novel-m0585-3p	-	0.9096	0.326	0	0	0	0	0.411867	0.01	-5.36411	0.0279974
novel-m0586-3p	-	0.9096	0.326	0	0	0	0	0.411867	0.01	-5.36411	0.0280041
novel-m0596-5p	-	0.6497	0.326	0.3275	0	0	0	0.4344	0.01	-5.44095	0.0169797
novel-m0609-3p	-	0.3898	0.652	0	0	0	0	0.347267	0.01	-5.11797	0.0297776
novel-m0616-5p	-	1.1695	0.652	0	0	0.1228	0	0.607167	0.0409333	-3.89074	0.0244302
novel-m0624-3p	-	0.9096	0.326	0	0	0	0	0.411867	0.01	-5.36411	0.0280149
novel-m0626-5p	-	0.3898	0.4347	0.1638	0	0	0	0.329433	0.01	-5.04191	0.0340656
novel-m0647-5p	-	0.3898	1.0866	0.4913	0	0	0	0.6559	0.01	-6.0354	0.0037834
novel-m0657-3p	-	0	0	0	0.3102	0.4912	0.3435	0.01	0.381633	5.25412	0.0281167
novel-m0659-3p	-	0.3898	1.9559	0.6551	0	0	0.3435	1.00027	0.1145	-3.12697	0.00924026
novel-m0667-5p	-	0.6497	0.4347	0.9826	0	0	0.1717	0.689	0.0572333	-3.58958	0.0187538
novel-m0699-3p	-	0.7797	0.8693	0.8188	0.3102	0.1228	0.1717	0.8226	0.201567	-2.02893	0.0478295
novel-m0719-5p	-	0.5198	0.4347	0	0	0	0	0.318167	0.01	-4.99171	0.0425884
novel-m0738-5p	-	177.636	33.7941	449.05	20.1614	23.0856	40.1876	220.16	27.8115	-2.9848	0.000695389
novel-m0742-3p	-	20.0117	16.6254	17.0318	6.6688	7.6133	4.8088	17.8896	6.36363	-1.4912	0.0332584
novel-m0747-5p	-	0	0	0.4913	2.4814	1.3508	5.1523	0.163767	2.99483	4.19276	4.37561e-05
novel-m0765-3p	-	0.7797	1.0866	2.2927	0	0.3684	0.3435	1.38633	0.2373	-2.54649	0.0214854
novel-m0785-3p	-	2.9888	7.2804	4.258	0.3102	0.614	1.3739	4.8424	0.766033	-2.66024	0.00138196
novel-m0797-5p	-	1.2995	0.8693	0.1638	0	0	0.3435	0.777533	0.1145	-2.76356	0.0263981
novel-m0798-5p	-	1.2995	0.8693	0.1638	0	0	0.3435	0.777533	0.1145	-2.76356	0.0264639
novel-m0801-3p	-	13.2545	17.1687	4.7493	0.4653	1.5963	9.7893	11.7242	3.9503	-1.56945	0.0246855
novel-m0807-3p	-	0.9096	0.4347	1.9652	0.3102	0	0.1717	1.10317	0.160633	-2.77981	0.0203372
novel-m0813-5p	-	2.2091	1.5213	0.4913	0.4653	0.2456	0.1717	1.40723	0.2942	-2.25799	0.0261163
novel-m0814-3p	-	2.9888	7.2804	4.258	0.3102	0.614	1.3739	4.8424	0.766033	-2.66024	0.00137411
novel-m0840-5p	-	0.7797	0.7606	0.3275	0	0	0	0.6226	0.01	-5.96023	0.0048322
novel-m0851-5p	-	1.5594	0.652	1.1464	0.3102	0	0.3435	1.11927	0.2179	-2.36082	0.023742
novel-m0854-5p	-	0.6497	1.0866	0.1638	0	0	0	0.633367	0.01	-5.98497	0.00452222
novel-m0861-5p	-	0.5198	1.4126	0.6551	0	0.2456	0	0.8625	0.0818667	-3.39718	0.0131702
novel-m0865-3p	-	0.7797	0.2173	1.8014	0	0	0.1717	0.9328	0.0572333	-4.02664	0.0117236
novel-m0879-5p	-	1.9492	0.4347	2.9478	0	0	0	1.77723	0.01	-7.47349	6.06504e-05
novel-m0897-5p	-	2.7289	3.0426	2.129	0.3102	0.2456	1.7174	2.6335	0.757733	-1.79722	0.0178698
novel-m0901-5p	-	0.1299	0	0.4913	0.6203	0.614	0.8587	0.207067	0.697667	1.75244	0.0354433
novel-m0910-3p	-	0.6497	1.1953	1.4739	0.1551	0.2456	0.3435	1.1063	0.248067	-2.15694	0.0283179
novel-m0911-3p	-	1.9492	0.652	4.4217	0.1551	0.1228	1.0305	2.34097	0.436133	-2.42426	0.0193298
novel-m0912-3p	-	2.5989	0.5433	8.3521	0.3102	0.1228	0.3435	3.83143	0.258833	-3.88779	0.000584368
novel-m0916-3p	-	0.6497	0.652	0.4913	0	0	0	0.597667	0.01	-5.90127	0.00558881
novel-m0922-3p	-	0.6497	0.978	0	0	0	0	0.542567	0.01	-5.76173	0.00848794
novel-m0937-3p	-	0	0	0.3275	2.7916	0.1228	0	0.109167	0.971467	3.15363	0.030783
novel-m0939-5p	-	0	0	0	0.9305	0.1228	0.5152	0.01	0.522833	5.70828	0.0203396
novel-m0944-5p	-	0	0	0.4913	0.7754	0.3684	1.0305	0.163767	0.724767	2.14587	0.0381326
novel-m0959-3p	-	8.7064	4.1292	36.3564	2.4814	2.3331	2.0609	16.3973	2.2918	-2.83891	0.00225284
novel-m0959-5p	-	1.9492	1.4126	3.1116	0.1551	0.614	0.3435	2.1578	0.370867	-2.54059	0.00861814
novel-m0967-3p	-	1.2995	0.7606	1.4739	0	0.1228	0.5152	1.178	0.212667	-2.46967	0.0191918
novel-m0975-5p	-	1.1695	1.304	0.3275	2.1712	4.6662	13.5676	0.933667	6.80167	2.86491	0.0412369
novel-m0976-3p	-	0.9096	0	2.2927	3.1017	6.8765	9.4458	1.06743	6.47467	2.60066	0.000671446
novel-m0982-5p	-	1.0396	0.5433	0.1638	0	0	0	0.582233	0.01	-5.86353	0.00897278
novel-m1023-5p	-	0.3898	1.0866	0.4913	0	0	0	0.6559	0.01	-6.0354	0.00370736
novel-m1026-5p	-	0	0	0	0.4653	0.4912	0.1717	0.01	0.376067	5.23292	0.0376499
novel-m1037-3p	-	0.3898	0.5433	0	0	0	0	0.311033	0.01	-4.959	0.0398491
novel-m1049-3p	-	0.1299	0.326	0.8188	0	0	0	0.4249	0.01	-5.40905	0.041163
novel-m1060-5p	-	3.7684	3.2599	2.784	0.6203	0.7368	1.3739	3.27077	0.910333	-1.84516	0.0115467
novel-m1069-5p	-	0.5198	0.652	0.1638	0	0	0	0.4452	0.01	-5.47638	0.0171303
novel-m1071-5p	-	30.6673	16.6254	11.3	2.9467	2.7015	8.9306	19.5309	4.8596	-2.00685	0.00470394
novel-m1073-5p	-	1.0396	0.978	3.1116	0.1551	0.3684	0.3435	1.70973	0.289	-2.56463	0.015102
novel-m1083-3p	-	0.1299	0.652	0.3275	0	0	0	0.3698	0.01	-5.20867	0.0303025
novel-m1107-5p	-	2.9888	7.2804	4.258	0.3102	0.614	1.3739	4.8424	0.766033	-2.66024	0.00137783
novel-m1119-3p	-	1.2995	0.4347	0.3275	0	0.1228	0	0.687233	0.0409333	-4.06945	0.0182246
novel-m1121-5p	-	1.9492	0.8693	1.3101	0.1551	0.3684	0.3435	1.3762	0.289	-2.25155	0.021917
novel-m1125-5p	-	0.3898	0.5433	0.1638	0	0	0	0.365633	0.01	-5.19233	0.0310068
novel-m1129-5p	-	0	0	0.1638	0.6203	0.3684	0.1717	0.0546	0.3868	2.82461	0.0263729
novel-m1156-3p	-	0.2599	0.2173	0.4913	0	0	0	0.322833	0.01	-5.01272	0.0411393
novel-m1165-5p	-	31.8368	10.7576	48.8027	6.2035	5.7714	18.8916	30.4657	10.2888	-1.56611	0.0349473
novel-m1166-5p	-	0.3898	0.326	0.3275	0	0	0	0.347767	0.01	-5.12005	0.0305428
novel-m1169-5p	-	0.2599	0.652	0.1638	0	0	0	0.358567	0.01	-5.16417	0.0308614
novel-m1174-5p	-	1.9492	0.2173	9.0072	0.6203	0.1228	0.3435	3.72457	0.3622	-3.36221	0.0142527
novel-m1177-5p	-	1.9492	0.2173	9.0072	0.6203	0.1228	0.3435	3.72457	0.3622	-3.36221	0.0142143
novel-m1178-5p	-	1.9492	0.2173	9.0072	0.6203	0.1228	0.3435	3.72457	0.3622	-3.36221	0.0142136
novel-m1190-3p	-	1.1695	1.4126	1.9652	0	0.1228	0.1717	1.51577	0.0981667	-3.94867	0.00111227
novel-m1197-5p	-	2.9888	7.2804	4.258	0.3102	0.614	1.3739	4.8424	0.766033	-2.66024	0.00138062
novel-m1200-5p	-	1.9492	0.4347	2.9478	0	0	0	1.77723	0.01	-7.47349	6.11674e-05
novel-m1203-5p	-	0	0	0	0.7754	1.9647	2.0609	0.01	1.60033	7.32223	5.70485e-05
novel-m1206-3p	-	0.5198	0.2173	1.3101	0	0.1228	0	0.6824	0.0409333	-4.05927	0.0291418
novel-m1207-5p	-	0.6497	0.326	1.3101	1.0856	3.9295	3.9501	0.761933	2.9884	1.97164	0.0153574
novel-m1212-5p	-	0.3898	1.0866	0.4913	0	0	0	0.6559	0.01	-6.0354	0.00377361
novel-m1215-5p	-	0.3898	1.0866	0.4913	0	0	0	0.6559	0.01	-6.0354	0.00377089
novel-m1219-5p	-	2.0791	0.978	0.9826	0	0	0.5152	1.34657	0.171733	-2.97104	0.00705515
novel-m1220-3p	-	0.6497	0.4347	1.4739	2.3263	2.0875	4.637	0.852767	3.01693	1.82286	0.0264085
novel-m1224-3p	-	1.2995	0.4347	3.6029	0	0.1228	0.1717	1.77903	0.0981667	-4.17972	0.0014284
novel-m1228-5p	-	0	0	0	0.6203	0.614	0	0.01	0.411433	5.36259	0.0387188
novel-m1238-5p	-	0	0	0	0.7754	1.9647	2.0609	0.01	1.60033	7.32223	5.663e-05
novel-m1249-3p	-	0.2599	0.8693	0	0	0	0	0.3764	0.01	-5.23419	0.0269428
novel-m1253-3p	-	0.5198	0.1087	0.4913	0	0	0	0.373267	0.01	-5.22213	0.0449862
novel-m1275-3p	-	5.3278	3.1512	1.9652	0.4653	0.9824	2.4044	3.4814	1.28403	-1.43898	0.0403372
novel-m1284-5p	-	0.2599	0	8.1884	0	0.1228	0.1717	2.8161	0.0981667	-4.84232	0.0218067
novel-m1288-3p	-	1.9492	0.326	0.3275	0	0	0.3435	0.867567	0.1145	-2.92163	0.0319889
novel-m1310-5p	-	0.7797	0.7606	1.1464	0.1551	0.3684	0	0.895567	0.1745	-2.35957	0.0468861
novel-m1314-5p	-	0.6497	2.1733	1.6377	0	0.2456	0	1.4869	0.0818667	-4.18289	0.00222422
novel-m1328-3p	-	0.5198	0.4347	0	0	0	0	0.318167	0.01	-4.99171	0.0424613
novel-m1332-5p	-	0	0	0	0.4653	0.1228	1.5457	0.01	0.711267	6.15232	0.0121595
novel-m1344-3p	-	0.3898	0.2173	0.3275	0	0	0	0.311533	0.01	-4.96131	0.048378
novel-m1345-3p	-	0.7797	0.7606	1.1464	0.1551	0.3684	0	0.895567	0.1745	-2.35957	0.0469909
novel-m1350-3p	-	1.6893	0.978	2.9478	0.1551	0	0	1.8717	0.0517	-5.17804	0.000168852
novel-m1356-3p	-	0	0	0.1638	0.1551	0.4912	0.687	0.0546	0.444433	3.02499	0.0211902
novel-m1359-5p	-	1.4294	0.8693	0.1638	0	0	0.5152	0.820833	0.171733	-2.25692	0.0474198
novel-m1361-3p	-	2.7289	4.0205	0.4913	0.3102	0.1228	1.5457	2.41357	0.659567	-1.87158	0.0202949
novel-m1366-3p	-	0.5198	0.1087	0.6551	0	0	0	0.427867	0.01	-5.41909	0.0281086
novel-m1367-5p	-	0.5198	0.326	1.1464	0	0.1228	0	0.664067	0.0409333	-4.01998	0.0225384
novel-m1370-3p	-	1.9492	0.652	4.4217	0.1551	0.1228	1.0305	2.34097	0.436133	-2.42426	0.0193733
novel-m1375-5p	-	1.0396	3.0426	1.6377	0.1551	0.3684	0	1.90663	0.1745	-3.44973	0.00226406
novel-m1378-3p	-	1.1695	0.978	0.8188	0	0	0.3435	0.988767	0.1145	-3.11028	0.00780672
novel-m1379-3p	-	1.0396	0.2173	0.1638	0	0	0	0.473567	0.01	-5.5655	0.0273293
novel-m1395-5p	-	165.161	31.9469	327.699	14.5782	17.437	35.5505	174.936	22.5219	-2.95742	0.000438669
novel-m1399-3p	-	2.9888	7.2804	4.258	0.3102	0.614	1.3739	4.8424	0.766033	-2.66024	0.00137967
novel-m1416-5p	-	0.7797	1.0866	0.1638	0	0	0.3435	0.6767	0.1145	-2.56317	0.0316581
novel-m1420-5p	-	1.1695	0.652	1.6377	0.1551	0.2456	0.1717	1.15307	0.1908	-2.59534	0.0168152
novel-m1432-5p	-	0.7797	0.5433	0.4913	0.1551	0	0	0.604767	0.0517	-3.54814	0.0232209
novel-m1435-3p	-	1.0396	0.978	0.6551	0.1551	0.1228	0	0.8909	0.0926333	-3.26566	0.00979441
novel-m1442-3p	-	0	0	0.1638	0.4653	0.2456	0.3435	0.0546	0.351467	2.68642	0.0410828
novel-m1443-5p	-	1.0396	1.0866	0.9826	0.1551	0	0.1717	1.03627	0.108933	-3.24988	0.00524539
novel-m1446-5p	-	0.6497	0.2173	0.8188	0	0	0.1717	0.561933	0.0572333	-3.29547	0.0414246
novel-m1464-5p	-	0.6497	1.7386	0.1638	0.1551	0.2456	0.3435	0.8507	0.248067	-1.77792	0.0499201
novel-m1468-3p	-	2.5989	1.304	6.8782	0.4653	0.2456	1.3739	3.5937	0.694933	-2.37052	0.00931387
novel-m1474-5p	-	0	0	0	0.1551	0.4912	0.3435	0.01	0.329933	5.0441	0.0475846
novel-m1520-5p	-	1.2995	0.8693	0.1638	0	0	0.3435	0.777533	0.1145	-2.76356	0.0265384
novel-m1523-3p	-	3.1187	1.8473	1.6377	0.1551	0.2456	0.3435	2.20123	0.248067	-3.14951	0.00107814
novel-m1536-3p	-	0.6497	0.978	0	0	0	0	0.542567	0.01	-5.76173	0.00849309
novel-m1567-3p	-	1.6893	2.1733	1.8014	0	0	1.2022	1.888	0.400733	-2.23614	0.0122877
novel-m1568-5p	-	0.3898	1.0866	0.4913	0	0	0	0.6559	0.01	-6.0354	0.003739
novel-m1572-5p	-	11.955	13.8002	25.7115	3.2568	1.5963	4.637	17.1556	3.16337	-2.43914	0.00115328
novel-m1579-3p	-	3.1187	1.8473	1.6377	0.1551	0.2456	0.3435	2.20123	0.248067	-3.14951	0.00108262
novel-m1601-5p	-	1.6893	1.7386	1.6377	0.1551	0.1228	0.3435	1.68853	0.207133	-3.02714	0.00210101
novel-m1602-3p	-	2.7289	1.1953	1.6377	0.1551	0.614	0.3435	1.85397	0.370867	-2.32164	0.0154197
novel-m1602-5p	-	8.8363	4.1292	36.6839	2.6365	2.3331	2.0609	16.5498	2.3435	-2.82008	0.00245952
novel-m1608-3p	-	0.6497	0.8693	0.8188	0	0.1228	0.1717	0.779267	0.0981667	-2.98881	0.0175031
novel-m1609-3p	-	0.6497	0.652	0.4913	0	0	0	0.597667	0.01	-5.90127	0.00559598
novel-m1610-3p	-	2.5989	1.304	6.8782	0.4653	0.2456	1.3739	3.5937	0.694933	-2.37052	0.00930769
novel-m1631-5p	-	12.3449	7.6064	7.3695	0.4653	0.8596	3.7783	9.10693	1.70107	-2.42053	0.00181341
novel-m1638-5p	-	1.0396	0.978	3.1116	0.1551	0.3684	0.3435	1.70973	0.289	-2.56463	0.0150551
novel-m1643-5p	-	0.5198	0.326	1.1464	0	0.1228	0	0.664067	0.0409333	-4.01998	0.0224735
novel-m1674-5p	-	0.2599	0.1087	0.6551	1.2407	1.1052	1.3739	0.341233	1.23993	1.86143	0.0318252
novel-m1686-5p	-	3.3786	1.8473	10.8087	0.1551	0	0.5152	5.34487	0.223433	-4.58024	1.4108e-05
novel-m1687-5p	-	1.9492	0.2173	9.0072	0.6203	0.1228	0.3435	3.72457	0.3622	-3.36221	0.0141835
novel-m1688-5p	-	1.9492	0.2173	9.0072	0.6203	0.1228	0.3435	3.72457	0.3622	-3.36221	0.0141447
novel-m1689-3p	-	2.5989	4.3465	0.4913	0.3102	0.1228	1.2022	2.4789	0.545067	-2.1852	0.0105918
novel-m1696-3p	-	0.5198	0.4347	0	0	0	0	0.318167	0.01	-4.99171	0.0425256
ptc-miR1444a	miR1444	7.0171	1.8473	64.5244	131.98	105.481	24.7308	24.4629	87.3972	1.83699	0.00431934
ptc-miR156g	miR156	1227.99	209.067	15260.7	11544.9	13517.1	15909.6	5565.91	13657.2	1.29497	0.0178517
ptc-miR156h	miR156	1259.57	218.521	15315.2	11577.3	13554.3	15985	5597.77	13705.5	1.29184	0.0175651
ptc-miR156i	miR156	1227.99	209.067	15260.7	11544.9	13517.1	15909.6	5565.91	13657.2	1.29497	0.0178268
ptc-miR156j	miR156	1227.99	209.067	15260.7	11544.9	13517.1	15909.6	5565.91	13657.2	1.29497	0.0178393
ptc-miR156l	miR156	0.1299	0.1087	2.4565	2.4814	1.5963	2.2326	0.898367	2.10343	1.22737	0.0363881
ptc-miR159c	miR159	0.1299	0	0	0.1551	0.614	2.5761	0.0433	1.11507	4.68662	0.00947877
ptc-miR160b-3p	miR160	29.6277	10.2143	87.2881	4.8077	6.2626	12.0219	42.3767	7.6974	-2.46083	0.00310892
ptc-miR160c-3p	miR160	29.6277	10.2143	87.2881	4.8077	6.2626	12.0219	42.3767	7.6974	-2.46083	0.00310036
ptc-miR164a	miR164	133.325	41.7265	1073.33	1477.67	1368.06	1424.94	416.128	1423.56	1.7744	0.00192572
ptc-miR164b	miR164	138.523	44.8777	1090.2	1490.08	1378.5	1439.88	424.534	1436.16	1.75826	0.00199181
ptc-miR164c	miR164	133.325	41.7265	1073.33	1477.67	1367.94	1424.77	416.128	1423.46	1.77431	0.00193073
ptc-miR164d	miR164	133.325	41.7265	1073.33	1477.67	1368.06	1424.94	416.128	1423.56	1.7744	0.00193823
ptc-miR164e	miR164	136.573	43.1391	1092.98	1493.34	1382.8	1439.71	424.232	1438.62	1.76176	0.00202299
ptc-miR164f	miR164	0.1299	0	0.1638	2.6365	0.8596	4.4653	0.0979	2.6538	4.76061	2.92887e-05
ptc-miR166a	miR166	643680	548769	139583	727.05	1164.1	4721.01	444011	2204.05	-7.65429	1.65874e-10
ptc-miR166b	miR166	650849	556392	142070	819.482	1293.28	5330.01	449770	2480.92	-7.50217	2.6102e-10
ptc-miR166c	miR166	643649	548744	139564	726.895	1162.87	4719.29	443986	2203.02	-7.65489	1.60967e-10
ptc-miR166d	miR166	651408	556463	142215	818.862	1293.9	5334.13	450029	2482.3	-7.5022	2.65719e-10
ptc-miR166e	miR166	650849	556392	142070	819.482	1293.28	5330.01	449770	2480.92	-7.50217	2.6715e-10
ptc-miR166f	miR166	651408	556463	142215	818.862	1293.9	5334.13	450029	2482.3	-7.5022	2.59079e-10
ptc-miR166g	miR166	803648	868641	315232	6091.68	7457.37	26157.3	662507	13235.5	-5.64546	2.04391e-08
ptc-miR166h	miR166	803648	868641	315232	6091.68	7457.37	26157.3	662507	13235.5	-5.64546	2.07974e-08
ptc-miR166i	miR166	644888	549726	140021	758.223	1207.45	4923.84	444878	2296.5	-7.59783	1.98297e-10
ptc-miR166j	miR166	643680	548769	139583	727.05	1164.1	4721.01	444011	2204.05	-7.65429	1.64677e-10
ptc-miR166k	miR166	643680	548769	139583	727.05	1164.1	4721.01	444011	2204.05	-7.65429	1.62801e-10
ptc-miR166l	miR166	644888	549726	140021	758.223	1207.45	4923.84	444878	2296.5	-7.59783	1.98584e-10
ptc-miR166m	miR166	804246	868763	315402	6092.46	7460.93	26166.6	662804	13240	-5.64561	2.1133e-08
ptc-miR166n	miR166	162049	321295	179966	5353.78	6274.85	21295.6	221103	10974.8	-4.33246	1.31204e-06
ptc-miR166o	miR166	162049	321295	179966	5353.78	6274.85	21295.6	221103	10974.8	-4.33246	1.32426e-06
ptc-miR166p	miR166	25.5994	44.6604	25.8753	0.4653	0.4912	3.0914	32.045	1.3493	-4.56982	1.69228e-06
ptc-miR166q	miR166	162050	321296	179968	5353.78	6274.85	21295.6	221105	10974.8	-4.33247	1.3283e-06
ptc-miR169ac	miR169	30.0176	4.3465	97.1141	79.2497	63.8537	183.42	43.8261	108.841	1.31236	0.018867
ptc-miR169ad	miR169	30.0176	4.3465	97.1141	79.2497	63.8537	183.249	43.8261	108.784	1.3116	0.0188905
ptc-miR169b-3p	miR169	0.5198	0.1087	7.5333	5.5831	6.9993	4.637	2.7206	5.7398	1.07708	0.0309244
ptc-miR172d	miR172	0.5198	0	0.9826	1.861	1.7191	0.8587	0.5008	1.4796	1.5629	0.03665
ptc-miR172e	miR172	0.5198	0	0.9826	1.861	1.7191	0.8587	0.5008	1.4796	1.5629	0.0365632
ptc-miR2111a	miR2111	0.9096	0.1087	3.9304	19.8512	20.3841	21.296	1.64957	20.5104	3.6362	8.87099e-07
ptc-miR2111b	miR2111	0.9096	0.1087	3.9304	19.8512	20.3841	21.296	1.64957	20.5104	3.6362	8.91766e-07
ptc-miR3627a	miR3627	12.8647	2.9339	23.4188	1.0856	4.4206	3.4348	13.0725	2.98033	-2.13299	0.0244091
ptc-miR390a	miR390	166.461	43.7911	595.95	395.473	313.988	1226.75	268.734	645.404	1.26402	0.0271033
ptc-miR390b	miR390	166.461	43.7911	596.114	395.473	314.356	1226.75	268.789	645.527	1.26401	0.0271503
ptc-miR390c	miR390	166.461	43.7911	595.95	395.473	313.988	1226.75	268.734	645.404	1.26402	0.0271506
ptc-miR390d-5p	miR390	166.461	43.7911	596.114	395.473	314.356	1226.75	268.789	645.527	1.26401	0.0272628
ptc-miR393a-5p	miR393	5.7176	0.978	126.428	140.199	118.129	74.3642	44.3747	110.898	1.32142	0.0224639
ptc-miR393b-5p	miR393	5.7176	0.978	126.428	140.199	118.129	74.3642	44.3747	110.898	1.32142	0.0224304
ptc-miR394a-5p	miR394	258.333	24.0145	2152.72	1804.91	1885.65	1754.69	811.69	1815.08	1.16103	0.025744
ptc-miR394b-5p	miR394	262.231	24.0145	2155.51	1804.29	1886.51	1760.18	813.918	1816.99	1.1586	0.0258474
ptc-miR396a	miR396	23286.2	18238.1	253283	836000	835933	755829	98269	809254	3.04178	1.50594e-05
ptc-miR396b	miR396	23286.2	18238.1	253283	836000	835933	755829	98269	809254	3.04178	1.48517e-05
ptc-miR396e-3p	miR396	242.739	147.238	1186.66	45.4406	57.0999	196.988	525.546	99.8428	-2.39609	0.00643849
ptc-miR396f	miR396	2192.32	1980.7	2246.07	343.829	355.247	476.412	2139.7	391.829	-2.44911	0.000613301
ptc-miR408-5p	miR408	58.0859	126.157	39.6317	25.1242	28.4886	9.4458	74.625	21.0195	-1.82793	0.0168937
ptc-miR477a-5p	miR477	10.7855	0.8693	65.9983	47.922	29.2253	150.618	25.8844	75.9216	1.55243	0.018393
ptc-miR477b	miR477	10.7855	0.8693	65.9983	47.922	29.2253	150.618	25.8844	75.9216	1.55243	0.0184268
ptc-miR6425a-3p	miR6425	1699.31	1222.78	1462.61	146.092	188.491	747.764	1461.57	360.782	-2.01831	0.0036069
ptc-miR6425a-5p	miR6425	1.9492	0.2173	19.3246	0.3102	0.4912	1.5457	7.1637	0.782367	-3.19479	0.0239744
ptc-miR6425b-3p	miR6425	1699.31	1222.78	1462.61	146.092	188.491	747.764	1461.57	360.782	-2.01831	0.00359038
ptc-miR6425b-5p	miR6425	1.9492	0.2173	19.3246	0.3102	0.4912	1.5457	7.1637	0.782367	-3.19479	0.0240501
ptc-miR6425c-3p	miR6425	1699.31	1222.78	1462.61	146.092	188.491	747.764	1461.57	360.782	-2.01831	0.00357396
ptc-miR6425c-5p	miR6425	1.9492	0.2173	19.3246	0.3102	0.4912	1.5457	7.1637	0.782367	-3.19479	0.024038
ptc-miR6425d-3p	miR6425	1699.31	1222.78	1462.61	146.092	188.491	747.764	1461.57	360.782	-2.01831	0.00362354
ptc-miR6425d-5p	miR6425	1.9492	0.2173	19.3246	0.3102	0.4912	1.5457	7.1637	0.782367	-3.19479	0.0240839
ptc-miR6425e	miR6425	1.9492	0.2173	19.3246	0.3102	0.4912	1.5457	7.1637	0.782367	-3.19479	0.024067
ptc-miR6427-3p	miR6427	662.076	810.298	984.079	167.96	211.822	393.632	818.818	257.805	-1.66726	0.00982152
ptc-miR6437a	miR6437	189.072	211.458	71.0751	15.1986	29.4709	99.095	157.202	47.9215	-1.71387	0.0105096
ptc-miR6437b	miR6437	189.072	211.458	71.0751	15.1986	29.4709	99.095	157.202	47.9215	-1.71387	0.0105824
ptc-miR6457b	miR6457	7.9267	2.2819	22.5999	0.1551	0.614	1.5457	10.9362	0.7716	-3.82511	8.38541e-05
ptc-miR6461	miR6461	0	0	0.8188	1.0856	0.4912	1.8892	0.272933	1.15533	2.08169	0.0179755
ptc-miR6462c-5p	miR6462	1.1695	0.5433	4.5855	0.1551	0	0	2.09943	0.0517	-5.34369	0.000276415
ptc-miR6479	miR6479	0	0	0.1638	0	0.3684	1.2022	0.0546	0.523533	3.26131	0.0464345
ptc-miR828a	miR828	0.2599	0.4347	3.9304	0	0	0	1.54167	0.01	-7.26835	0.00102707
ptc-miR828b-5p	miR828	0.2599	0.4347	3.9304	0	0	0	1.54167	0.01	-7.26835	0.00103864

## Sheet: S6 TS-SS-miR
Table S6 DE-miRNA library for TS vs SS
id	family	TS-1_TPM	TS-2_TPM	TS-3_TPM	SS-1_TPM	SS-2_TPM	SS-3_TPM	control_mean	treat_mean	log2(fc)	PValue
miR397-x	miR397	1.1602	5.1743	0.1702	0	0	0.6551	2.16823	0.218367	-3.3117	0.00937946
ptc-miR397a	miR397	0.6446	6.1275	0.1702	0	0	1.1464	2.3141	0.382133	-2.5983	0.0359134
miR11466-x	miR11466	0	0	0	0.3102	1.1052	0.3435	0.01	0.5863	5.87357	0.00230029
miR11544-x	miR11544	0.2578	0.1362	0.1702	0.3102	2.8243	1.0305	0.188067	1.38833	2.88404	0.00176237
miR159-x	miR159	99.9057	121.189	134.12	38.3066	36.3475	40.1876	118.405	38.2806	-1.62904	0.0216518
miR165-x	miR165	4.6408	1.3617	3.0636	0.1551	0.1228	0.5152	3.02203	0.264367	-3.51491	0.000239078
miR165-y	miR165	102.613	15.9315	18.5521	0.6203	1.3508	4.1218	45.6988	2.03097	-4.49192	4.50044e-06
miR166-x	miR166	52.0799	42.348	53.1032	1.861	2.5787	5.6675	49.177	3.36907	-3.86756	2.76721e-09
miR166-y	miR166	4452.57	1490.48	1669.69	98.3255	126.479	424.889	2537.58	216.565	-3.55058	4.87413e-06
miR167-y	miR167	2.3204	9.3955	10.2122	2.0161	2.0875	1.8892	7.30937	1.9976	-1.87148	0.0485153
miR2662-y	miR2662	0	0.4085	0.3404	0.9305	0.7368	1.3739	0.249633	1.01373	2.0218	0.0066805
miR3946-x	miR3946	0.5156	0.1362	0.5106	0	0	0	0.387467	0.01	-5.276	0.0370234
miR396-y	miR396	73.9947	75.3004	82.378	9.3052	12.8935	44.3094	77.2244	22.1694	-1.80049	0.00829968
miR408-x	miR408	10.8285	3.9488	2.2126	1.3958	1.5963	0.3435	5.6633	1.11187	-2.34866	0.0270292
miR475-x	miR475	6.3166	4.7658	6.4677	0.9305	1.9647	3.0914	5.85003	1.99553	-1.55167	0.0481217
miR5168-y	miR5168	220.179	58.2795	70.9745	3.7221	4.5434	15.4568	116.478	7.90743	-3.8807	2.48048e-06
miR5248-x	miR5248	0	0	0	0.1551	0.2456	0.3435	0.01	0.248067	4.63266	0.0346276
miR6425-x	miR6425	1.2891	4.902	5.1061	0.3102	0.9824	0.5152	3.76573	0.6026	-2.64366	0.00828087
miR6425-y	miR6425	10.1839	7.0807	6.2975	0.9305	1.5963	2.7479	7.85403	1.75823	-2.15931	0.00298297
miR6427-y	miR6427	3.6095	2.451	2.8934	0.6203	0.614	0.8587	2.98463	0.697667	-2.09694	0.0130345
miR6470-x	miR6470	2.1915	2.9957	2.3828	0.4653	0.614	0.3435	2.52333	0.474267	-2.41156	0.00975049
miR858-x	miR858	31.8409	55.6923	68.7618	21.7122	12.5251	12.0219	52.0983	15.4197	-1.75646	0.0356955
miR950-x	miR950	0.3867	0.6808	0.3404	0.7754	2.7015	0.687	0.4693	1.38797	1.56439	0.0173566
novel-m0057-5p	-	1.0313	1.4978	0.5106	0.1551	0.1228	0.3435	1.01323	0.207133	-2.29033	0.0485126
novel-m0058-3p	-	0	0.2723	0.1702	0.7754	0.2456	0.5152	0.1475	0.512067	1.79562	0.0452015
novel-m0080-5p	-	0.5156	0.4085	0.5106	0	0.1228	0	0.478233	0.0409333	-3.54637	0.0418248
novel-m0083-5p	-	0.6446	0.1362	0.5106	0	0	0	0.430467	0.01	-5.42783	0.026467
novel-m0088-5p	-	4.383	1.634	2.2126	0.3102	0.2456	1.7174	2.7432	0.757733	-1.8561	0.0340576
novel-m0097-5p	-	0.3867	0.5447	1.8722	0	0	0.1717	0.934533	0.0572333	-4.02932	0.00653793
novel-m0145-5p	-	0.6446	0.1362	0.851	0	0	0	0.543933	0.01	-5.76536	0.011477
novel-m0146-3p	-	0.2578	0.2723	0.5106	0	0	0	0.3469	0.01	-5.11645	0.0397779
novel-m0155-3p	-	0.2578	0.5447	0.6808	0	0	0	0.494433	0.01	-5.6277	0.0073448
novel-m0182-3p	-	0.5156	0.4085	0.5106	0	0.1228	0	0.478233	0.0409333	-3.54637	0.0418167
novel-m0190-3p	-	0.6446	0.1362	0.5106	0	0	0	0.430467	0.01	-5.42783	0.0265285
novel-m0232-5p	-	0.7735	0.2723	0.5106	0	0.1228	0	0.5188	0.0409333	-3.66383	0.0404518
novel-m0243-3p	-	3.6095	2.3148	2.8934	0.3102	0.614	1.3739	2.93923	0.766033	-1.93996	0.0179744
novel-m0252-5p	-	0.5156	0.4085	0.5106	0	0.1228	0	0.478233	0.0409333	-3.54637	0.0418369
novel-m0260-5p	-	0.5156	1.2255	0.1702	0	0	0	0.6371	0.01	-5.99345	0.00705744
novel-m0270-3p	-	0.6446	0.4085	0.1702	0	0	0	0.407767	0.01	-5.34967	0.0266129
novel-m0316-5p	-	2.9649	0.9532	1.702	0.1551	0.1228	0.3435	1.87337	0.207133	-3.177	0.00233246
novel-m0367-3p	-	0	0	0	0.3102	0.2456	0.1717	0.01	0.2425	4.59991	0.0427775
novel-m0395-3p	-	0	0.1362	0	0.1551	0.3684	0.687	0.0454	0.4035	3.1518	0.0406664
novel-m0423-5p	-	0.1289	0	0.3404	0.7754	0.2456	1.7174	0.156433	0.9128	2.54475	0.00581925
novel-m0499-5p	-	1.8047	2.1787	1.702	0	0	0.687	1.89513	0.229	-3.04888	0.00110583
novel-m0516-3p	-	0.2578	0.5447	0.6808	0	0	0	0.494433	0.01	-5.6277	0.00738531
novel-m0521-3p	-	1.9337	0.5447	1.3616	0	0	0.5152	1.28	0.171733	-2.8979	0.00835596
novel-m0540-3p	-	2.3204	0.817	1.0212	0.1551	0.1228	0.1717	1.3862	0.149867	-3.20938	0.00649413
novel-m0542-5p	-	0.6446	1.2255	2.0424	0	0.4912	0	1.30417	0.163733	-2.99371	0.0330949
novel-m0547-5p	-	1.1602	0.4085	0.3404	0	0.1228	0.1717	0.636367	0.0981667	-2.69655	0.0491245
novel-m0556-3p	-	3.6095	2.3148	2.8934	0.3102	0.614	1.3739	2.93923	0.766033	-1.93996	0.0179803
novel-m0568-5p	-	0	0	0	0.4653	0.2456	0.5152	0.01	0.4087	5.35297	0.00658884
novel-m0573-3p	-	1.0313	0	0.3404	0	0	0	0.457233	0.01	-5.51486	0.0438106
novel-m0579-3p	-	2.7071	0.4085	0.1702	0	0.1228	0	1.09527	0.0409333	-4.74186	0.00728299
novel-m0605-5p	-	0.3867	0.9532	0.5106	0	0.1228	0	0.616833	0.0409333	-3.91353	0.0218915
novel-m0651-3p	-	0	0	0.1702	0.3102	0.2456	0.5152	0.0567333	0.357	2.65366	0.0499613
novel-m0657-3p	-	0	0.1362	0.1702	0.3102	0.4912	0.3435	0.102133	0.381633	1.90173	0.0401819
novel-m0713-3p	-	0.2578	0.2723	0.5106	0	0	0	0.3469	0.01	-5.11645	0.0394819
novel-m0719-5p	-	0.5156	0.4085	0.5106	0	0	0	0.478233	0.01	-5.57964	0.00796404
novel-m0738-5p	-	77.3463	144.473	168.671	20.1614	23.0856	40.1876	130.163	27.8115	-2.22657	0.000496285
novel-m0742-3p	-	42.9272	25.5994	23.6582	6.6688	7.6133	4.8088	30.7283	6.36363	-2.27164	0.00343915
novel-m0785-3p	-	3.6095	2.3148	2.8934	0.3102	0.614	1.3739	2.93923	0.766033	-1.93996	0.0179645
novel-m0814-3p	-	3.6095	2.3148	2.8934	0.3102	0.614	1.3739	2.93923	0.766033	-1.93996	0.0179635
novel-m0815-3p	-	0.9024	1.3617	0.1702	0.1551	0	0.1717	0.811433	0.108933	-2.89703	0.0480432
novel-m0819-3p	-	0	0.2723	0.1702	1.3958	0.4912	0.3435	0.1475	0.7435	2.33362	0.00939661
novel-m0840-5p	-	0.7735	0.4085	0.5106	0	0	0	0.5642	0.01	-5.81813	0.00498695
novel-m0846-5p	-	0	0.2723	0.3404	0.9305	0.4912	0.687	0.204233	0.7029	1.7831	0.0163401
novel-m0857-5p	-	0.3867	0.5447	1.5318	0	0.1228	0.1717	0.821067	0.0981667	-3.06419	0.0289091
novel-m0879-5p	-	0.1289	0.817	0.5106	0	0	0	0.4855	0.01	-5.6014	0.0230005
novel-m0897-5p	-	3.9962	3.268	2.8934	0.3102	0.2456	1.7174	3.38587	0.757733	-2.15976	0.0082821
novel-m0912-3p	-	1.1602	1.634	1.702	0.3102	0.1228	0.3435	1.49873	0.258833	-2.53365	0.0104384
novel-m0937-3p	-	0	0.1362	0.1702	2.7916	0.1228	0	0.102133	0.971467	3.24971	0.0103617
novel-m0939-5p	-	0	0.1362	0.1702	0.9305	0.1228	0.5152	0.102133	0.522833	2.3559	0.0249708
novel-m0959-3p	-	5.9299	15.3869	22.6369	2.4814	2.3331	2.0609	14.6512	2.2918	-2.67647	0.000680813
novel-m0959-5p	-	1.2891	2.3148	1.8722	0.1551	0.614	0.3435	1.82537	0.370867	-2.29921	0.0313182
novel-m0992-5p	-	0	0.2723	0.5106	1.2407	0.8596	0.1717	0.260967	0.757333	1.53706	0.0401961
novel-m0993-5p	-	0	0.2723	0.5106	1.2407	0.8596	0.1717	0.260967	0.757333	1.53706	0.0400507
novel-m0998-5p	-	0	0	0.3404	1.2407	0.1228	0.1717	0.113467	0.511733	2.17312	0.0421062
novel-m1045-5p	-	0.1289	0	0.3404	0.6203	0	1.7174	0.156433	0.779233	2.31651	0.0372241
novel-m1058-3p	-	0.5156	0.5447	0.5106	0	0	0.1717	0.523633	0.0572333	-3.19363	0.0252947
novel-m1060-5p	-	6.3166	2.9957	2.3828	0.6203	0.7368	1.3739	3.89837	0.910333	-2.0984	0.0114379
novel-m1075-3p	-	0	0.2723	0	0.1551	0.4912	0.687	0.0907667	0.444433	2.29173	0.0340558
novel-m1092-5p	-	0	0.6808	1.0212	0	0	0	0.567333	0.01	-5.82612	0.026588
novel-m1107-5p	-	3.6095	2.3148	2.8934	0.3102	0.614	1.3739	2.93923	0.766033	-1.93996	0.0179811
novel-m1119-3p	-	1.418	0.817	1.3616	0	0.1228	0	1.19887	0.0409333	-4.87225	0.000486049
novel-m1121-5p	-	0.6446	1.4978	1.8722	0.1551	0.3684	0.3435	1.3382	0.289	-2.21115	0.0407736
novel-m1165-5p	-	25.911	26.0079	31.8279	6.2035	5.7714	18.8916	27.9156	10.2888	-1.43999	0.0366327
novel-m1174-5p	-	1.2891	1.3617	2.553	0.6203	0.1228	0.3435	1.7346	0.3622	-2.25974	0.0296271
novel-m1177-5p	-	1.2891	1.3617	2.553	0.6203	0.1228	0.3435	1.7346	0.3622	-2.25974	0.0295301
novel-m1178-5p	-	1.2891	1.3617	2.553	0.6203	0.1228	0.3435	1.7346	0.3622	-2.25974	0.0296619
novel-m1190-3p	-	1.0313	0.2723	0.851	0	0.1228	0.1717	0.7182	0.0981667	-2.87108	0.0375476
novel-m1197-5p	-	3.6095	2.3148	2.8934	0.3102	0.614	1.3739	2.93923	0.766033	-1.93996	0.0179644
novel-m1200-5p	-	0.1289	0.817	0.5106	0	0	0	0.4855	0.01	-5.6014	0.0230228
novel-m1219-5p	-	2.0626	0.5447	1.0212	0	0	0.5152	1.2095	0.171733	-2.81617	0.0127771
novel-m1224-3p	-	0.6446	1.9063	1.5318	0	0.1228	0.1717	1.3609	0.0981667	-3.79318	0.00124164
novel-m1249-3p	-	0.9024	0.1362	0.1702	0	0	0	0.402933	0.01	-5.33247	0.0484316
novel-m1257-5p	-	0	0	0	0.1551	0.4912	0.5152	0.01	0.387167	5.27488	0.00946897
novel-m1291-3p	-	0.5156	0.5447	0.1702	0	0	0	0.410167	0.01	-5.35814	0.0225839
novel-m1301-3p	-	0	0.1362	0.5106	0.9305	0.4912	0.3435	0.2156	0.5884	1.44844	0.0474198
novel-m1328-3p	-	0.5156	0.4085	0.5106	0	0	0	0.478233	0.01	-5.57964	0.00798684
novel-m1379-3p	-	0.5156	0.817	0.5106	0	0	0	0.6144	0.01	-5.94111	0.00319963
novel-m1395-5p	-	71.8032	114.38	138.204	14.5782	17.437	35.5505	108.129	22.5219	-2.26336	0.00031145
novel-m1399-3p	-	3.6095	2.3148	2.8934	0.3102	0.614	1.3739	2.93923	0.766033	-1.93996	0.0179778
novel-m1400-3p	-	0.1289	0.5447	0.5106	0	0	0	0.394733	0.01	-5.30281	0.0289602
novel-m1447-3p	-	0.5156	0.1362	0.6808	0	0	0	0.4442	0.01	-5.47314	0.0226692
novel-m1546-5p	-	1.1602	0.6808	0.6808	0.1551	0	0	0.8406	0.0517	-4.02318	0.0129687
novel-m1556-3p	-	0	0.4085	1.1914	0	0	0	0.5333	0.01	-5.73688	0.0448231
novel-m1558-5p	-	0	0	0	0.4653	0.2456	0.3435	0.01	0.351467	5.13532	0.0142742
novel-m1602-5p	-	5.9299	15.9315	22.8071	2.6365	2.3331	2.0609	14.8895	2.3435	-2.66756	0.000731089
novel-m1631-5p	-	17.6607	5.3105	7.9995	0.4653	0.8596	3.7783	10.3236	1.70107	-2.60143	0.00159217
novel-m1669-5p	-	0	0	0	0.4653	0.2456	0.5152	0.01	0.4087	5.35297	0.00662092
novel-m1686-5p	-	1.9337	2.5872	3.0636	0.1551	0	0.5152	2.52817	0.223433	-3.50018	0.000126818
novel-m1687-5p	-	1.2891	1.3617	2.553	0.6203	0.1228	0.3435	1.7346	0.3622	-2.25974	0.0294939
novel-m1688-5p	-	1.2891	1.3617	2.553	0.6203	0.1228	0.3435	1.7346	0.3622	-2.25974	0.0295773
novel-m1696-3p	-	0.5156	0.4085	0.5106	0	0	0	0.478233	0.01	-5.57964	0.00795341
ptc-miR160b-3p	miR160	15.7271	31.1823	33.3597	4.8077	6.2626	12.0219	26.7564	7.6974	-1.79744	0.00883872
ptc-miR160c-3p	miR160	15.7271	31.1823	33.3597	4.8077	6.2626	12.0219	26.7564	7.6974	-1.79744	0.00883236
ptc-miR166a	miR166	372364	52818.5	59925.1	727.05	1164.1	4721.01	161702	2204.05	-6.19704	4.9542e-09
ptc-miR166b	miR166	379469	54278.8	61423.4	819.482	1293.28	5330.01	165057	2480.92	-6.05594	8.55113e-09
ptc-miR166c	miR166	372349	52808.9	59908.4	726.895	1162.87	4719.29	161689	2203.02	-6.19759	4.98624e-09
ptc-miR166d	miR166	379825	54336	61470.5	818.862	1293.9	5334.13	165211	2482.3	-6.05649	8.50827e-09
ptc-miR166e	miR166	379469	54278.8	61423.4	819.482	1293.28	5330.01	165057	2480.92	-6.05594	8.53648e-09
ptc-miR166f	miR166	379825	54336	61470.5	818.862	1293.9	5334.13	165211	2482.3	-6.05649	8.21835e-09
ptc-miR166g	miR166	603108	124826	152788	6091.68	7457.37	26157.3	293574	13235.5	-4.47125	3.74071e-07
ptc-miR166h	miR166	603108	124826	152788	6091.68	7457.37	26157.3	293574	13235.5	-4.47125	3.73888e-07
ptc-miR166i	miR166	373614	53071.1	60193.7	758.223	1207.45	4923.84	162293	2296.5	-6.14302	6.18148e-09
ptc-miR166j	miR166	372364	52818.5	59925.1	727.05	1164.1	4721.01	161702	2204.05	-6.19704	4.93623e-09
ptc-miR166k	miR166	372364	52818.5	59925.1	727.05	1164.1	4721.01	161702	2204.05	-6.19704	4.97215e-09
ptc-miR166l	miR166	373614	53071.1	60193.7	758.223	1207.45	4923.84	162293	2296.5	-6.14302	6.08257e-09
ptc-miR166m	miR166	603510	124898	152859	6092.46	7460.93	26166.6	293756	13240	-4.47164	3.71585e-07
ptc-miR166n	miR166	231530	72374.8	93401.7	5353.78	6274.85	21295.6	132436	10974.8	-3.59303	3.6044e-06
ptc-miR166o	miR166	231530	72374.8	93401.7	5353.78	6274.85	21295.6	132436	10974.8	-3.59303	3.61764e-06
ptc-miR166p	miR166	33.3878	9.6679	14.297	0.4653	0.4912	3.0914	19.1176	1.3493	-3.82462	8.77198e-06
ptc-miR166q	miR166	231531	72375.1	93401.9	5353.78	6274.85	21295.6	132436	10974.8	-3.59304	3.64697e-06
ptc-miR396e-3p	miR396	308.354	388.349	455.803	45.4406	57.0999	196.988	384.168	99.8428	-1.94401	0.00365192
ptc-miR398c-5p	miR398	116.922	25.7356	7.3187	9.1502	12.2796	2.4044	49.9921	7.94473	-2.65363	0.0208511
ptc-miR399i	miR399	0	0.9532	1.0212	0	0	0	0.658133	0.01	-6.04031	0.0141053
ptc-miR408-5p	miR408	281.798	65.3602	24.1688	25.1242	28.4886	9.4458	123.776	21.0195	-2.55793	0.0156746
ptc-miR6425a-3p	miR6425	1996.82	1126.51	1149.38	146.092	188.491	747.764	1424.24	360.782	-1.98099	0.00544357
ptc-miR6425a-5p	miR6425	1.8047	4.902	7.3187	0.3102	0.4912	1.5457	4.67513	0.782367	-2.57909	0.00219049
ptc-miR6425b-3p	miR6425	1996.82	1126.51	1149.38	146.092	188.491	747.764	1424.24	360.782	-1.98099	0.00543049
ptc-miR6425b-5p	miR6425	1.8047	4.902	7.3187	0.3102	0.4912	1.5457	4.67513	0.782367	-2.57909	0.00219216
ptc-miR6425c-3p	miR6425	1996.82	1126.51	1149.38	146.092	188.491	747.764	1424.24	360.782	-1.98099	0.00544372
ptc-miR6425c-5p	miR6425	1.8047	4.902	7.3187	0.3102	0.4912	1.5457	4.67513	0.782367	-2.57909	0.00219552
ptc-miR6425d-3p	miR6425	1996.82	1126.51	1149.38	146.092	188.491	747.764	1424.24	360.782	-1.98099	0.00545923
ptc-miR6425d-5p	miR6425	1.8047	4.902	7.3187	0.3102	0.4912	1.5457	4.67513	0.782367	-2.57909	0.00218388
ptc-miR6425e	miR6425	1.8047	4.902	7.3187	0.3102	0.4912	1.5457	4.67513	0.782367	-2.57909	0.00218859
ptc-miR6427-3p	miR6427	790.351	558.285	708.213	167.96	211.822	393.632	685.616	257.805	-1.41112	0.0407584
ptc-miR6441	miR6441	1.1602	4.2212	2.2126	5.5831	4.9118	5.1523	2.53133	5.21573	1.04297	0.0128689
ptc-miR6457b	miR6457	2.836	3.5403	4.0849	0.1551	0.614	1.5457	3.48707	0.7716	-2.17609	0.00760386
ptc-miR6465	miR6465	1.0313	0.6808	0.851	0	0.1228	0.3435	0.854367	0.155433	-2.45856	0.0234303
ptc-miR7829	miR7829	1.6758	0.817	1.702	0.4653	0.2456	0	1.39827	0.236967	-2.56088	0.0418433
ptc-miR827	miR827	13.7934	34.9949	37.2744	9.4603	9.0869	7.2132	28.6876	8.5868	-1.74023	0.0384715
